# Supplementary material for: Prokaryotes Regulate Particulate Organic Carbon Export in Suspended and Sinking Particle Fractions
Source: Research Square preprint supplement (doi:10.21203/rs.3.rs-952425/v1), 2021-10-20
Supplement: Supplementary file 1 [file d4ea95b9c00014fe8cdd7dc4.xlsx]

## Sheet: S2
MAG_ID	MAG_name	GTDB-Tk Taxonomic Classification	Marker sets	Completeness (%)	Contamination (%)	GC	std	Genome size	contigs	longest contig	N50	Mean contigs length	Coding density	Predicted genes	5s rRNA	16s rRNA	23s rRNA	tRNA
S75_maxbin_06	SP1_Poseidoniia	d__Archaea;p__Thermoplasmatota;c__Poseidoniia;o__Poseidoniales;f__Thalassoarchaeaceae;g__MGIIb-O2;s__	125	86.9333	1.39487	0.376758	0.0200669	1553036	175	44665	16061	8874.49	0.941157	1480	1	1	1	41
S75_metabat_05	SP1_Nitrososphaeria	d__Archaea;p__Crenarchaeota;c__Nitrososphaeria;o__Nitrososphaerales;f__Nitrosopumilaceae;g__Nitrosopumilus;s__	103	53.9457	0.970874	0.312403	0.0198786	850510	206	34551	4547	4128.69	0.910388	1219	1	1	1	21
S76_metabat_1	SK1_Poseidoniia	d__Archaea;p__Thermoplasmatota;c__Poseidoniia;o__Poseidoniales;f__Thalassoarchaeaceae;g__MGIIb-O2;s__	125	77.7026	2.4	0.375579	0.0145799	1379735	142	93701	13863	9716.44	0.94451	1333	1	1	1	33
S76_metabat_2	SK1_Gammaproteobacteria	d__Bacteria;p__Proteobacteria;c__Gammaproteobacteria;o__Thiomicrospirales;f__Thioglobaceae;g__Thioglobus;s__	151	71.56	0.0367918	0.354365	0.0149382	1250218	85	86190	24724	14708.4	0.946651	1295	0	1	0	23
S76_metabat_4	SK1_Nitrososphaeria	d__Archaea;p__Crenarchaeota;c__Nitrososphaeria;o__Nitrososphaerales;f__Nitrosopumilaceae;g__Nitrosopumilus;s__	103	72.1309	1.2945	0.311121	0.0197755	1009186	257	19294	4661	3926.79	0.908374	1445	1	0	0	29
S77_maxbin_10	SP2_Poseidoniia_a	d__Archaea;p__Thermoplasmatota;c__Poseidoniia;o__Poseidoniales;f__Thalassoarchaeaceae;g__MGIIb-O1;s__MGIIb-O1 sp002497895	125	68.3385	4.5776	0.521869	0.0237513	1513482	483	15327	4305	3133.5	0.941317	1662	1	1	1	32
S77_metabat_01	SP2_Poseidoniia_b	d__Archaea;p__Thermoplasmatota;c__Poseidoniia;o__Poseidoniales;f__Thalassoarchaeaceae;g__MGIIb-O2;s__	125	80.5333	0	0.37491	0.00984583	1415650	57	116160	45064	24836	0.946939	1268	1	1	1	31
S77_metabat_06	SP2_Gammaproteobacteria	d__Bacteria;p__Proteobacteria;c__Gammaproteobacteria;o__SAR86;f__D2472;g__D2472;s__	174	58.908	6.92848	0.373837	0.012603	1216036	179	38342	9229	6793.5	0.963784	1350	1	0	0	18
S77_metabat_07	SP2_Nitrososphaeria	d__Archaea;p__Crenarchaeota;c__Nitrososphaeria;o__Nitrososphaerales;f__Nitrosopumilaceae;g__Nitrosopumilus;s__	103	60.1755	7.76699	0.310543	0.019749	976091	268	26128	3981	3642.13	0.912042	1454	0	0	0	35
S78_maxbin_06	SK2_Gammaproteobacteria	d__Bacteria;p__Proteobacteria;c__Gammaproteobacteria;o__Enterobacterales;f__Alteromonadaceae;g__Pseudoalteromonas;s__	296	82.4474	2.31202	0.411292	0.0171488	4025507	1088	34014	4983	3699.91	0.90178	4303	0	0	0	23
S78_metabat_2	SK2_Poseidoniia	d__Archaea;p__Thermoplasmatota;c__Poseidoniia;o__Poseidoniales;f__Thalassoarchaeaceae;g__MGIIb-O2;s__	125	79.8769	0.4	0.375942	0.0123693	1433144	137	47864	15750	10460.9	0.948768	1352	1	1	0	33
S78_metabat_6	SK2_Nitrososphaeria	d__Archaea;p__Crenarchaeota;c__Nitrososphaeria;o__Nitrososphaerales;f__Nitrosopumilaceae;g__Nitrosopumilus;s__	103	75.6161	12.945	0.316134	0.0202737	1226935	336	20492	3947	3651.59	0.917315	1796	1	0	0	39
S79_metabat_3	SP3_Cyanobacteriia	d__Bacteria;p__Cyanobacteria;c__Cyanobacteriia;o__Synechococcales;f__Cyanobiaceae;g__Synechococcus_C;s__Synechococcus_C sp003208835	368	65.0362	0.0603865	0.561848	0.0210463	1228865	220	18118	6458	5585.75	0.930136	1468	0	0	0	32
S80_maxbin_15	SK3_Cyanobacteriia	d__Bacteria;p__Cyanobacteria;c__Cyanobacteriia;o__Synechococcales;f__Cyanobiaceae;g__Synechococcus_C;s__Synechococcus_C sp003208835	368	91.0326	0.13587	0.559144	0.0334469	1676654	294	63121	9136	5702.9	0.920782	1998	0	1	1	38
S81_maxbin_08	SP4_Cyanobacteriia	d__Bacteria;p__Cyanobacteria;c__Cyanobacteriia;o__Synechococcales;f__Cyanobiaceae;g__Synechococcus_C;s__Synechococcus_C sp003208835	368	84.526	14.9806	0.567259	0.0225	1913334	691	20286	3700	2768.93	0.912545	2411	0	1	1	34
S81_metabat_03	SP4_Poseidoniia	d__Archaea;p__Thermoplasmatota;c__Poseidoniia;o__Poseidoniales;f__Thalassoarchaeaceae;g__MGIIb-O2;s__	125	78.4718	0.8	0.374897	0.0130552	1432273	136	73292	14325	10531.4	0.947102	1330	1	1	1	30
S82_metabat_3	SK4_Poseidoniia	d__Archaea;p__Thermoplasmatota;c__Poseidoniia;o__Poseidoniales;f__Thalassoarchaeaceae;g__MGIIb-O2;s__	174	43.7859	0.0319285	0.37869	0.0099686	704486	104	25206	9322	6773.9	0.965473	762	0	0	0	32
S82_metabat_6	SK4_Cyanobacteriia	d__Bacteria;p__Cyanobacteria;c__Cyanobacteriia;o__Synechococcales;f__Cyanobiaceae;g__Synechococcus_C;s__Synechococcus_C sp003208835	125	78.4491	1.84615	0.375461	0.0127554	1426530	120	60382	18115	11887.8	0.948092	1329	1	0	0	24
S83_maxbin_09	SP5_Cyanobacteria	d__Bacteria;p__Cyanobacteria;c__Cyanobacteriia;o__Synechococcales;f__Cyanobiaceae;g__Synechococcus_C;s__Synechococcus_C sp003208835	368	67.3007	0.679348	0.563754	0.0183533	1221797	187	24007	7940	6533.67	0.935241	1459	0	0	0	37
S83_metabat_2	SP5_Poseidoniia	d__Archaea;p__Thermoplasmatota;c__Poseidoniia;o__Poseidoniales;f__Thalassoarchaeaceae;g__MGIIb-O2;s__	368	85.779	9.83202	0.56259	0.0270828	2170916	918	23500	2927	2364.83	0.908646	2693	1	1	1	32
S84_metabat_03	SK5_Poseidoniia	d__Archaea;p__Thermoplasmatota;c__Poseidoniia;o__Poseidoniales;f__Thalassoarchaeaceae;g__MGIIb-O2;s__	125	79.4667	3.2	0.375272	0.0139064	1457805	157	54255	12827	9285.38	0.946597	1390	0	0	0	32
S84_metabat_04	SK5_Gammaproteobacteria_a	d__Bacteria;p__Proteobacteria;c__Gammaproteobacteria;o__SAR86;f__D2472;g__D2472;s__	174	55.0168	4.94891	0.375495	0.0119486	1122908	159	31580	9470	7062.31	0.962787	1227	1	1	1	17
S84_metabat_06	SK5_Gammaproteobacteria_b	d__Bacteria;p__Proteobacteria;c__Gammaproteobacteria;o__SAR86;f__SAR86;g__;s__	174	72.4617	7.8584	0.365905	0.0123072	1344060	202	28376	9352	6653.76	0.961754	1514	1	1	0	22
S84_metabat_07	SK5_Cyanobacteriia	d__Bacteria;p__Cyanobacteria;c__Cyanobacteriia;o__Synechococcales;f__Cyanobiaceae;g__Synechococcus_C;s__Synechococcus_C sp003208835	368	69.8822	0.679348	0.563721	0.0176527	1241995	208	23334	7005	5971.13	0.927824	1474	1	1	1	31

## Sheet: S3
Bacteria ANI
Genome 1	Genome 2	ANI Score (%)
GCF_000012505.1_ASM1250v1_genomic.gbff.fasta	S82_metabat_6.fasta	88.0513
GCF_000012505.1_ASM1250v1_genomic.gbff.fasta	S84_metabat_07.fasta	88.0387
GCF_000012505.1_ASM1250v1_genomic.gbff.fasta	S81_maxbin_08.fasta	87.8876
GCF_000012505.1_ASM1250v1_genomic.gbff.fasta	S80_maxbin_15.fasta	87.8511
GCF_000012505.1_ASM1250v1_genomic.gbff.fasta	S83_maxbin_09.fasta	87.7929
GCF_000012505.1_ASM1250v1_genomic.gbff.fasta	S79_metabat_3.fasta	87.7457
GCF_000012625.1_ASM1262v1_genomic.gbff.fasta	S80_maxbin_15.fasta	78.218
GCF_000012625.1_ASM1262v1_genomic.gbff.fasta	S81_maxbin_08.fasta	78.1114
GCF_000012625.1_ASM1262v1_genomic.gbff.fasta	S83_maxbin_09.fasta	78.0904
GCF_000012625.1_ASM1262v1_genomic.gbff.fasta	S82_metabat_6.fasta	77.8566
GCF_000012625.1_ASM1262v1_genomic.gbff.fasta	S79_metabat_3.fasta	77.7774
GCF_000012625.1_ASM1262v1_genomic.gbff.fasta	S84_metabat_07.fasta	77.7325
GCF_000014585.1_ASM1458v1_genomic.gbff.fasta	S84_metabat_07.fasta	78.0471
GCF_000014585.1_ASM1458v1_genomic.gbff.fasta	S81_maxbin_08.fasta	77.781
GCF_000014585.1_ASM1458v1_genomic.gbff.fasta	S82_metabat_6.fasta	77.5107
GCF_000014585.1_ASM1458v1_genomic.gbff.fasta	S80_maxbin_15.fasta	77.2842
GCF_000014585.1_ASM1458v1_genomic.gbff.fasta	S79_metabat_3.fasta	77.0448
GCF_000026085.1_ASM2608v1_genomic.gbff.fasta	S78_maxbin_06.fasta	79.4445
GCF_000161795.2_ASM16179v2_genomic.gbff.fasta	S80_maxbin_15.fasta	78.1694
GCF_000161795.2_ASM16179v2_genomic.gbff.fasta	S84_metabat_07.fasta	77.996
GCF_000161795.2_ASM16179v2_genomic.gbff.fasta	S82_metabat_6.fasta	77.9928
GCF_000161795.2_ASM16179v2_genomic.gbff.fasta	S79_metabat_3.fasta	77.9921
GCF_000161795.2_ASM16179v2_genomic.gbff.fasta	S81_maxbin_08.fasta	77.954
GCF_000161795.2_ASM16179v2_genomic.gbff.fasta	S83_maxbin_09.fasta	77.9288
GCF_000179235.2_ASM17923v2_genomic.gbff.fasta	S84_metabat_07.fasta	77.1546
GCF_000179235.2_ASM17923v2_genomic.gbff.fasta	S83_maxbin_09.fasta	77.0995
GCF_000179235.2_ASM17923v2_genomic.gbff.fasta	S81_maxbin_08.fasta	76.9555
GCF_000179235.2_ASM17923v2_genomic.gbff.fasta	S80_maxbin_15.fasta	76.8756
GCF_000179235.2_ASM17923v2_genomic.gbff.fasta	S79_metabat_3.fasta	76.8129
GCF_000179235.2_ASM17923v2_genomic.gbff.fasta	S82_metabat_6.fasta	76.7924
GCF_000195975.1_ASM19597v1_genomic.gbff.fasta	S81_maxbin_08.fasta	78.2408
GCF_000195975.1_ASM19597v1_genomic.gbff.fasta	S84_metabat_07.fasta	78.2041
GCF_000195975.1_ASM19597v1_genomic.gbff.fasta	S80_maxbin_15.fasta	77.8984
GCF_000195975.1_ASM19597v1_genomic.gbff.fasta	S82_metabat_6.fasta	77.8064
GCF_000195975.1_ASM19597v1_genomic.gbff.fasta	S79_metabat_3.fasta	77.7037
GCF_000195975.1_ASM19597v1_genomic.gbff.fasta	S83_maxbin_09.fasta	77.3383
GCF_000238395.3_ASM23839v4_genomic.gbff.fasta	S78_maxbin_06.fasta	79.7898
GCF_000737535.1_ASM73753v1_genomic.gbff.fasta	S81_maxbin_08.fasta	77.7276
GCF_000737535.1_ASM73753v1_genomic.gbff.fasta	S84_metabat_07.fasta	77.4714
GCF_000737535.1_ASM73753v1_genomic.gbff.fasta	S79_metabat_3.fasta	77.4491
GCF_000737535.1_ASM73753v1_genomic.gbff.fasta	S83_maxbin_09.fasta	77.2974
GCF_000737535.1_ASM73753v1_genomic.gbff.fasta	S82_metabat_6.fasta	77.1866
GCF_000737535.1_ASM73753v1_genomic.gbff.fasta	S80_maxbin_15.fasta	77.0518
GCF_000737575.1_ASM73757v1_genomic.gbff.fasta	S81_maxbin_08.fasta	78.2667
GCF_000737575.1_ASM73757v1_genomic.gbff.fasta	S82_metabat_6.fasta	78.1821
GCF_000737575.1_ASM73757v1_genomic.gbff.fasta	S80_maxbin_15.fasta	77.9562
GCF_000737575.1_ASM73757v1_genomic.gbff.fasta	S83_maxbin_09.fasta	77.883
GCF_000737575.1_ASM73757v1_genomic.gbff.fasta	S79_metabat_3.fasta	77.8806
GCF_000737575.1_ASM73757v1_genomic.gbff.fasta	S84_metabat_07.fasta	77.8403
GCF_000737595.1_ASM73759v1_genomic.gbff.fasta	S82_metabat_6.fasta	78.2101
GCF_000737595.1_ASM73759v1_genomic.gbff.fasta	S84_metabat_07.fasta	78.1674
GCF_000737595.1_ASM73759v1_genomic.gbff.fasta	S80_maxbin_15.fasta	78.0187
GCF_000737595.1_ASM73759v1_genomic.gbff.fasta	S79_metabat_3.fasta	77.9669
GCF_000737595.1_ASM73759v1_genomic.gbff.fasta	S83_maxbin_09.fasta	77.9649
GCF_000737595.1_ASM73759v1_genomic.gbff.fasta	S81_maxbin_08.fasta	77.8851
GCF_001182765.1_WH8103.1_genomic.gbff.fasta	S81_maxbin_08.fasta	78.0132
GCF_001182765.1_WH8103.1_genomic.gbff.fasta	S83_maxbin_09.fasta	77.7981
GCF_001182765.1_WH8103.1_genomic.gbff.fasta	S82_metabat_6.fasta	77.7881
GCF_001182765.1_WH8103.1_genomic.gbff.fasta	S80_maxbin_15.fasta	77.6962
GCF_001182765.1_WH8103.1_genomic.gbff.fasta	S84_metabat_07.fasta	77.6959
GCF_001182765.1_WH8103.1_genomic.gbff.fasta	S79_metabat_3.fasta	77.5654
GCF_002221525.1_ASM222152v1_genomic.gbff.fasta	S78_maxbin_06.fasta	79.8113
GCF_002310795.1_ASM231079v1_genomic.gbff.fasta	S78_maxbin_06.fasta	80.0369
GCF_002310835.1_ASM231083v1_genomic.gbff.fasta	S78_maxbin_06.fasta	80.254
GCF_003515105.1_ASM351510v1_genomic.gbff.fasta	S78_maxbin_06.fasta	79.3048
GCF_003668795.1_ASM366879v1_genomic.gbff.fasta	S78_maxbin_06.fasta	79.7997
GCF_004209775.1_ASM420977v1_genomic.gbff.fasta	S84_metabat_07.fasta	77.5448
GCF_004209775.1_ASM420977v1_genomic.gbff.fasta	S79_metabat_3.fasta	77.3548
GCF_004209775.1_ASM420977v1_genomic.gbff.fasta	S83_maxbin_09.fasta	77.1058
GCF_004209775.1_ASM420977v1_genomic.gbff.fasta	S80_maxbin_15.fasta	77.0947
GCF_004209775.1_ASM420977v1_genomic.gbff.fasta	S82_metabat_6.fasta	77.0714
GCF_004209775.1_ASM420977v1_genomic.gbff.fasta	S81_maxbin_08.fasta	77.0663
GCF_004328865.1_ASM432886v1_genomic.gbff.fasta	S78_maxbin_06.fasta	79.8188
GCF_014279535.1_ASM1427953v1_genomic.gbff.fasta	S81_maxbin_08.fasta	78.2769
GCF_014279535.1_ASM1427953v1_genomic.gbff.fasta	S83_maxbin_09.fasta	78.0339
GCF_014279535.1_ASM1427953v1_genomic.gbff.fasta	S80_maxbin_15.fasta	77.9047
GCF_014279535.1_ASM1427953v1_genomic.gbff.fasta	S84_metabat_07.fasta	77.8245
GCF_014279535.1_ASM1427953v1_genomic.gbff.fasta	S82_metabat_6.fasta	77.8082
GCF_014279535.1_ASM1427953v1_genomic.gbff.fasta	S79_metabat_3.fasta	77.707
GCF_014279555.1_ASM1427955v1_genomic.gbff.fasta	S82_metabat_6.fasta	78.4514
GCF_014279555.1_ASM1427955v1_genomic.gbff.fasta	S84_metabat_07.fasta	78.2331
GCF_014279555.1_ASM1427955v1_genomic.gbff.fasta	S81_maxbin_08.fasta	78.1038
GCF_014279555.1_ASM1427955v1_genomic.gbff.fasta	S80_maxbin_15.fasta	77.9814
GCF_014279555.1_ASM1427955v1_genomic.gbff.fasta	S79_metabat_3.fasta	77.7521
GCF_014279595.1_ASM1427959v1_genomic.gbff.fasta	S84_metabat_07.fasta	77.6309
GCF_014279595.1_ASM1427959v1_genomic.gbff.fasta	S81_maxbin_08.fasta	77.325
GCF_014279595.1_ASM1427959v1_genomic.gbff.fasta	S79_metabat_3.fasta	77.1343
GCF_014279595.1_ASM1427959v1_genomic.gbff.fasta	S83_maxbin_09.fasta	77.1282
GCF_014279595.1_ASM1427959v1_genomic.gbff.fasta	S80_maxbin_15.fasta	77.1022
GCF_014279595.1_ASM1427959v1_genomic.gbff.fasta	S82_metabat_6.fasta	76.8957
GCF_014279615.1_ASM1427961v1_genomic.gbff.fasta	S80_maxbin_15.fasta	78.1703
GCF_014279615.1_ASM1427961v1_genomic.gbff.fasta	S83_maxbin_09.fasta	78.1535
GCF_014279615.1_ASM1427961v1_genomic.gbff.fasta	S84_metabat_07.fasta	78.093
GCF_014279615.1_ASM1427961v1_genomic.gbff.fasta	S81_maxbin_08.fasta	78.0086
GCF_014279615.1_ASM1427961v1_genomic.gbff.fasta	S82_metabat_6.fasta	77.9965
GCF_014279615.1_ASM1427961v1_genomic.gbff.fasta	S79_metabat_3.fasta	77.8779
GCF_014279635.1_ASM1427963v1_genomic.gbff.fasta	S83_maxbin_09.fasta	78.183
GCF_014279635.1_ASM1427963v1_genomic.gbff.fasta	S81_maxbin_08.fasta	78.0005
GCF_014279635.1_ASM1427963v1_genomic.gbff.fasta	S84_metabat_07.fasta	77.9454
GCF_014279635.1_ASM1427963v1_genomic.gbff.fasta	S80_maxbin_15.fasta	77.9012
GCF_014279635.1_ASM1427963v1_genomic.gbff.fasta	S82_metabat_6.fasta	77.8434
GCF_014279635.1_ASM1427963v1_genomic.gbff.fasta	S79_metabat_3.fasta	77.6033
GCF_014279655.1_ASM1427965v1_genomic.gbff.fasta	S82_metabat_6.fasta	78.1104
GCF_014279655.1_ASM1427965v1_genomic.gbff.fasta	S84_metabat_07.fasta	77.9748
GCF_014279655.1_ASM1427965v1_genomic.gbff.fasta	S80_maxbin_15.fasta	77.9371
GCF_014279755.1_ASM1427975v1_genomic.gbff.fasta	S81_maxbin_08.fasta	78.1466
GCF_014279755.1_ASM1427975v1_genomic.gbff.fasta	S83_maxbin_09.fasta	77.9864
GCF_014279755.1_ASM1427975v1_genomic.gbff.fasta	S84_metabat_07.fasta	77.9573
GCF_014279755.1_ASM1427975v1_genomic.gbff.fasta	S80_maxbin_15.fasta	77.9241
GCF_014279755.1_ASM1427975v1_genomic.gbff.fasta	S82_metabat_6.fasta	77.9208
GCF_014279755.1_ASM1427975v1_genomic.gbff.fasta	S79_metabat_3.fasta	77.588
GCF_014279775.1_ASM1427977v1_genomic.gbff.fasta	S82_metabat_6.fasta	78.765
GCF_014279775.1_ASM1427977v1_genomic.gbff.fasta	S80_maxbin_15.fasta	78.2715
GCF_014279775.1_ASM1427977v1_genomic.gbff.fasta	S84_metabat_07.fasta	78.2453
GCF_014279775.1_ASM1427977v1_genomic.gbff.fasta	S79_metabat_3.fasta	77.7547
GCF_014279775.1_ASM1427977v1_genomic.gbff.fasta	S83_maxbin_09.fasta	77.2169
GCF_014279795.1_ASM1427979v1_genomic.gbff.fasta	S82_metabat_6.fasta	77.5599
GCF_014279795.1_ASM1427979v1_genomic.gbff.fasta	S81_maxbin_08.fasta	77.4935
GCF_014279795.1_ASM1427979v1_genomic.gbff.fasta	S80_maxbin_15.fasta	77.424
GCF_014279795.1_ASM1427979v1_genomic.gbff.fasta	S84_metabat_07.fasta	77.3988
GCF_014279795.1_ASM1427979v1_genomic.gbff.fasta	S79_metabat_3.fasta	77.3148
GCF_014279795.1_ASM1427979v1_genomic.gbff.fasta	S83_maxbin_09.fasta	77.202
GCF_014279815.1_ASM1427981v1_genomic.gbff.fasta	S84_metabat_07.fasta	77.7885
GCF_014279815.1_ASM1427981v1_genomic.gbff.fasta	S81_maxbin_08.fasta	77.7748
GCF_014279815.1_ASM1427981v1_genomic.gbff.fasta	S82_metabat_6.fasta	77.7648
GCF_014279815.1_ASM1427981v1_genomic.gbff.fasta	S83_maxbin_09.fasta	77.7366
GCF_014279815.1_ASM1427981v1_genomic.gbff.fasta	S80_maxbin_15.fasta	77.682
GCF_014279815.1_ASM1427981v1_genomic.gbff.fasta	S79_metabat_3.fasta	77.4168
GCF_014279835.1_ASM1427983v1_genomic.gbff.fasta	S84_metabat_07.fasta	78.3397
GCF_014279835.1_ASM1427983v1_genomic.gbff.fasta	S82_metabat_6.fasta	78.3023
GCF_014279835.1_ASM1427983v1_genomic.gbff.fasta	S80_maxbin_15.fasta	77.8188
GCF_014279835.1_ASM1427983v1_genomic.gbff.fasta	S81_maxbin_08.fasta	77.7059
GCF_014279835.1_ASM1427983v1_genomic.gbff.fasta	S79_metabat_3.fasta	77.61
GCF_014279875.1_ASM1427987v1_genomic.gbff.fasta	S81_maxbin_08.fasta	78.1219
GCF_014279875.1_ASM1427987v1_genomic.gbff.fasta	S82_metabat_6.fasta	77.6549
GCF_014279875.1_ASM1427987v1_genomic.gbff.fasta	S83_maxbin_09.fasta	77.5039
GCF_014279875.1_ASM1427987v1_genomic.gbff.fasta	S80_maxbin_15.fasta	77.4297
GCF_014279875.1_ASM1427987v1_genomic.gbff.fasta	S84_metabat_07.fasta	77.4262
GCF_014279875.1_ASM1427987v1_genomic.gbff.fasta	S79_metabat_3.fasta	77.333
GCF_014279895.1_ASM1427989v1_genomic.gbff.fasta	S81_maxbin_08.fasta	78.142
GCF_014279895.1_ASM1427989v1_genomic.gbff.fasta	S84_metabat_07.fasta	78.1094
GCF_014279895.1_ASM1427989v1_genomic.gbff.fasta	S83_maxbin_09.fasta	78.0598
GCF_014279895.1_ASM1427989v1_genomic.gbff.fasta	S80_maxbin_15.fasta	78.0552
GCF_014279895.1_ASM1427989v1_genomic.gbff.fasta	S82_metabat_6.fasta	77.8953
GCF_014279895.1_ASM1427989v1_genomic.gbff.fasta	S79_metabat_3.fasta	77.8763
GCF_014279955.1_ASM1427995v1_genomic.gbff.fasta	S81_maxbin_08.fasta	78.3621
GCF_014279955.1_ASM1427995v1_genomic.gbff.fasta	S82_metabat_6.fasta	78.173
GCF_014279955.1_ASM1427995v1_genomic.gbff.fasta	S83_maxbin_09.fasta	78.0459
GCF_014279955.1_ASM1427995v1_genomic.gbff.fasta	S84_metabat_07.fasta	77.9746
GCF_014279955.1_ASM1427995v1_genomic.gbff.fasta	S79_metabat_3.fasta	77.8006
GCF_014279955.1_ASM1427995v1_genomic.gbff.fasta	S80_maxbin_15.fasta	77.6799
GCF_014279975.1_ASM1427997v1_genomic.gbff.fasta	S81_maxbin_08.fasta	77.8034
GCF_014279975.1_ASM1427997v1_genomic.gbff.fasta	S84_metabat_07.fasta	77.7546
GCF_014279975.1_ASM1427997v1_genomic.gbff.fasta	S82_metabat_6.fasta	77.6602
GCF_014279975.1_ASM1427997v1_genomic.gbff.fasta	S79_metabat_3.fasta	77.3476
GCF_014280015.1_ASM1428001v1_genomic.gbff.fasta	S82_metabat_6.fasta	78.1605
GCF_014280015.1_ASM1428001v1_genomic.gbff.fasta	S84_metabat_07.fasta	78.1511
GCF_014280015.1_ASM1428001v1_genomic.gbff.fasta	S81_maxbin_08.fasta	78.1445
GCF_014280015.1_ASM1428001v1_genomic.gbff.fasta	S83_maxbin_09.fasta	77.8508
GCF_014280015.1_ASM1428001v1_genomic.gbff.fasta	S79_metabat_3.fasta	77.7665
GCF_014280015.1_ASM1428001v1_genomic.gbff.fasta	S80_maxbin_15.fasta	77.7245
GCF_014280035.1_ASM1428003v1_genomic.gbff.fasta	S80_maxbin_15.fasta	77.6646
GCF_014280035.1_ASM1428003v1_genomic.gbff.fasta	S84_metabat_07.fasta	77.6624
GCF_014280035.1_ASM1428003v1_genomic.gbff.fasta	S83_maxbin_09.fasta	77.6585
GCF_014280035.1_ASM1428003v1_genomic.gbff.fasta	S82_metabat_6.fasta	77.5152
GCF_014280035.1_ASM1428003v1_genomic.gbff.fasta	S79_metabat_3.fasta	77.2722
GCF_014280055.1_ASM1428005v1_genomic.gbff.fasta	S81_maxbin_08.fasta	77.958
GCF_014280055.1_ASM1428005v1_genomic.gbff.fasta	S82_metabat_6.fasta	77.8878
GCF_014280055.1_ASM1428005v1_genomic.gbff.fasta	S84_metabat_07.fasta	77.7645
GCF_014280055.1_ASM1428005v1_genomic.gbff.fasta	S80_maxbin_15.fasta	77.6907
GCF_014280055.1_ASM1428005v1_genomic.gbff.fasta	S79_metabat_3.fasta	77.495
GCF_014280055.1_ASM1428005v1_genomic.gbff.fasta	S83_maxbin_09.fasta	77.4486
GCF_014280075.1_ASM1428007v1_genomic.gbff.fasta	S83_maxbin_09.fasta	78.2298
GCF_014280075.1_ASM1428007v1_genomic.gbff.fasta	S81_maxbin_08.fasta	77.8925
GCF_014280075.1_ASM1428007v1_genomic.gbff.fasta	S82_metabat_6.fasta	77.8503
GCF_014280075.1_ASM1428007v1_genomic.gbff.fasta	S80_maxbin_15.fasta	77.8309
GCF_014280075.1_ASM1428007v1_genomic.gbff.fasta	S84_metabat_07.fasta	77.8133
GCF_014280075.1_ASM1428007v1_genomic.gbff.fasta	S79_metabat_3.fasta	77.7593
GCF_014280095.1_ASM1428009v1_genomic.gbff.fasta	S81_maxbin_08.fasta	78.2894
GCF_014280095.1_ASM1428009v1_genomic.gbff.fasta	S84_metabat_07.fasta	77.664
GCF_014280095.1_ASM1428009v1_genomic.gbff.fasta	S82_metabat_6.fasta	77.5759
GCF_014280095.1_ASM1428009v1_genomic.gbff.fasta	S83_maxbin_09.fasta	77.4939
GCF_014280095.1_ASM1428009v1_genomic.gbff.fasta	S79_metabat_3.fasta	77.2496
GCF_014280095.1_ASM1428009v1_genomic.gbff.fasta	S80_maxbin_15.fasta	77.0873
GCF_014280115.1_ASM1428011v1_genomic.gbff.fasta	S81_maxbin_08.fasta	78.1258
GCF_014280115.1_ASM1428011v1_genomic.gbff.fasta	S83_maxbin_09.fasta	78.0328
GCF_014280115.1_ASM1428011v1_genomic.gbff.fasta	S80_maxbin_15.fasta	77.9722
GCF_014280115.1_ASM1428011v1_genomic.gbff.fasta	S82_metabat_6.fasta	77.9266
GCF_014280115.1_ASM1428011v1_genomic.gbff.fasta	S79_metabat_3.fasta	77.9089
GCF_014280115.1_ASM1428011v1_genomic.gbff.fasta	S84_metabat_07.fasta	77.8581
GCF_014280175.1_ASM1428017v1_genomic.gbff.fasta	S82_metabat_6.fasta	78.316
GCF_014280175.1_ASM1428017v1_genomic.gbff.fasta	S80_maxbin_15.fasta	78.3114
GCF_014280175.1_ASM1428017v1_genomic.gbff.fasta	S84_metabat_07.fasta	78.2932
GCF_014280175.1_ASM1428017v1_genomic.gbff.fasta	S81_maxbin_08.fasta	78.2828
GCF_014280175.1_ASM1428017v1_genomic.gbff.fasta	S83_maxbin_09.fasta	78.1873
GCF_014280175.1_ASM1428017v1_genomic.gbff.fasta	S79_metabat_3.fasta	78.1292
GCF_014280195.1_ASM1428019v1_genomic.gbff.fasta	S84_metabat_07.fasta	78.3734
GCF_014280195.1_ASM1428019v1_genomic.gbff.fasta	S81_maxbin_08.fasta	78.2747
GCF_014280195.1_ASM1428019v1_genomic.gbff.fasta	S82_metabat_6.fasta	78.2674
GCF_014280195.1_ASM1428019v1_genomic.gbff.fasta	S80_maxbin_15.fasta	78.2225
GCF_014280195.1_ASM1428019v1_genomic.gbff.fasta	S79_metabat_3.fasta	78.1006
GCF_014280195.1_ASM1428019v1_genomic.gbff.fasta	S83_maxbin_09.fasta	77.8649
GCF_014280215.1_ASM1428021v1_genomic.gbff.fasta	S82_metabat_6.fasta	78.3682
GCF_014280215.1_ASM1428021v1_genomic.gbff.fasta	S83_maxbin_09.fasta	78.1477
GCF_014280215.1_ASM1428021v1_genomic.gbff.fasta	S84_metabat_07.fasta	78.1128
GCF_014280215.1_ASM1428021v1_genomic.gbff.fasta	S79_metabat_3.fasta	78.0969
GCF_014280215.1_ASM1428021v1_genomic.gbff.fasta	S80_maxbin_15.fasta	77.9983
GCF_014280215.1_ASM1428021v1_genomic.gbff.fasta	S81_maxbin_08.fasta	77.9947
GCF_014304795.1_ASM1430479v1_genomic.gbff.fasta	S84_metabat_07.fasta	77.4323
GCF_014304795.1_ASM1430479v1_genomic.gbff.fasta	S79_metabat_3.fasta	77.3472
GCF_014304795.1_ASM1430479v1_genomic.gbff.fasta	S83_maxbin_09.fasta	77.1577
GCF_014304795.1_ASM1430479v1_genomic.gbff.fasta	S81_maxbin_08.fasta	77.1196
GCF_014304795.1_ASM1430479v1_genomic.gbff.fasta	S82_metabat_6.fasta	77.082
GCF_014304795.1_ASM1430479v1_genomic.gbff.fasta	S80_maxbin_15.fasta	76.9413
GCF_014304815.1_ASM1430481v1_genomic.gbff.fasta	S80_maxbin_15.fasta	77.4343
GCF_014304815.1_ASM1430481v1_genomic.gbff.fasta	S81_maxbin_08.fasta	77.4057
GCF_014304815.1_ASM1430481v1_genomic.gbff.fasta	S83_maxbin_09.fasta	77.3784
GCF_014304815.1_ASM1430481v1_genomic.gbff.fasta	S82_metabat_6.fasta	77.2653
GCF_014304815.1_ASM1430481v1_genomic.gbff.fasta	S84_metabat_07.fasta	77.252
GCF_014304815.1_ASM1430481v1_genomic.gbff.fasta	S79_metabat_3.fasta	77.0152
S76_metabat_2.fasta	S76_metabat_2.fasta	100
S77_metabat_06.fasta	S77_metabat_06.fasta	100
S77_metabat_06.fasta	S84_metabat_04.fasta	98.325
S78_maxbin_06.fasta	S78_maxbin_06.fasta	100
S78_maxbin_06.fasta	GCF_002310835.1_ASM231083v1_genomic.gbff.fasta	80.0784
S78_maxbin_06.fasta	GCF_002310795.1_ASM231079v1_genomic.gbff.fasta	80.0382
S78_maxbin_06.fasta	GCF_002221525.1_ASM222152v1_genomic.gbff.fasta	79.8019
S78_maxbin_06.fasta	GCF_000238395.3_ASM23839v4_genomic.gbff.fasta	79.7436
S78_maxbin_06.fasta	GCF_004328865.1_ASM432886v1_genomic.gbff.fasta	79.7306
S78_maxbin_06.fasta	GCF_003668795.1_ASM366879v1_genomic.gbff.fasta	79.5317
S78_maxbin_06.fasta	GCF_000026085.1_ASM2608v1_genomic.gbff.fasta	79.4907
S78_maxbin_06.fasta	GCF_003515105.1_ASM351510v1_genomic.gbff.fasta	79.4022
S79_metabat_3.fasta	S79_metabat_3.fasta	100
S79_metabat_3.fasta	S80_maxbin_15.fasta	98.3792
S79_metabat_3.fasta	S82_metabat_6.fasta	98.0948
S79_metabat_3.fasta	S84_metabat_07.fasta	97.8006
S79_metabat_3.fasta	S81_maxbin_08.fasta	97.7705
S79_metabat_3.fasta	S83_maxbin_09.fasta	97.1766
S79_metabat_3.fasta	GCF_000012505.1_ASM1250v1_genomic.gbff.fasta	88.0492
S79_metabat_3.fasta	GCF_014280175.1_ASM1428017v1_genomic.gbff.fasta	78.4725
S79_metabat_3.fasta	GCF_000737575.1_ASM73757v1_genomic.gbff.fasta	78.3047
S79_metabat_3.fasta	GCF_014279895.1_ASM1427989v1_genomic.gbff.fasta	78.29
S79_metabat_3.fasta	GCF_000012625.1_ASM1262v1_genomic.gbff.fasta	78.2425
S79_metabat_3.fasta	GCF_014280115.1_ASM1428011v1_genomic.gbff.fasta	78.2165
S79_metabat_3.fasta	GCF_014280075.1_ASM1428007v1_genomic.gbff.fasta	78.2096
S79_metabat_3.fasta	GCF_000161795.2_ASM16179v2_genomic.gbff.fasta	78.2036
S79_metabat_3.fasta	GCF_014279535.1_ASM1427953v1_genomic.gbff.fasta	78.1899
S79_metabat_3.fasta	GCF_014279615.1_ASM1427961v1_genomic.gbff.fasta	78.1878
S79_metabat_3.fasta	GCF_014280195.1_ASM1428019v1_genomic.gbff.fasta	78.1717
S79_metabat_3.fasta	GCF_000737595.1_ASM73759v1_genomic.gbff.fasta	78.1636
S79_metabat_3.fasta	GCF_014279635.1_ASM1427963v1_genomic.gbff.fasta	78.1173
S79_metabat_3.fasta	GCF_014280215.1_ASM1428021v1_genomic.gbff.fasta	78.0841
S79_metabat_3.fasta	GCF_014279555.1_ASM1427955v1_genomic.gbff.fasta	78.0587
S79_metabat_3.fasta	GCF_014279755.1_ASM1427975v1_genomic.gbff.fasta	78.0106
S79_metabat_3.fasta	GCF_014279955.1_ASM1427995v1_genomic.gbff.fasta	78.0003
S79_metabat_3.fasta	GCF_014280055.1_ASM1428005v1_genomic.gbff.fasta	77.8531
S79_metabat_3.fasta	GCF_000195975.1_ASM19597v1_genomic.gbff.fasta	77.8245
S79_metabat_3.fasta	GCF_001182765.1_WH8103.1_genomic.gbff.fasta	77.8152
S79_metabat_3.fasta	GCF_014279835.1_ASM1427983v1_genomic.gbff.fasta	77.7591
S79_metabat_3.fasta	GCF_014280015.1_ASM1428001v1_genomic.gbff.fasta	77.7521
S79_metabat_3.fasta	GCF_014279775.1_ASM1427977v1_genomic.gbff.fasta	77.7134
S79_metabat_3.fasta	GCF_014279875.1_ASM1427987v1_genomic.gbff.fasta	77.6271
S79_metabat_3.fasta	GCF_014279815.1_ASM1427981v1_genomic.gbff.fasta	77.5797
S79_metabat_3.fasta	GCF_000737535.1_ASM73753v1_genomic.gbff.fasta	77.5242
S79_metabat_3.fasta	GCF_004209775.1_ASM420977v1_genomic.gbff.fasta	77.5006
S79_metabat_3.fasta	GCF_014279595.1_ASM1427959v1_genomic.gbff.fasta	77.4958
S79_metabat_3.fasta	GCF_014304795.1_ASM1430479v1_genomic.gbff.fasta	77.4592
S79_metabat_3.fasta	GCF_014279795.1_ASM1427979v1_genomic.gbff.fasta	77.4567
S79_metabat_3.fasta	GCF_014304815.1_ASM1430481v1_genomic.gbff.fasta	77.2316
S79_metabat_3.fasta	GCF_000014585.1_ASM1458v1_genomic.gbff.fasta	77.1936
S79_metabat_3.fasta	GCF_014280035.1_ASM1428003v1_genomic.gbff.fasta	77.1054
S79_metabat_3.fasta	GCF_014279975.1_ASM1427997v1_genomic.gbff.fasta	77.0723
S79_metabat_3.fasta	GCF_014280095.1_ASM1428009v1_genomic.gbff.fasta	77.0348
S79_metabat_3.fasta	GCF_000179235.2_ASM17923v2_genomic.gbff.fasta	76.9382
S80_maxbin_15.fasta	S80_maxbin_15.fasta	100
S80_maxbin_15.fasta	S82_metabat_6.fasta	98.3154
S80_maxbin_15.fasta	S79_metabat_3.fasta	98.185
S80_maxbin_15.fasta	S84_metabat_07.fasta	98.0845
S80_maxbin_15.fasta	S81_maxbin_08.fasta	97.9194
S80_maxbin_15.fasta	S83_maxbin_09.fasta	97.8561
S80_maxbin_15.fasta	GCF_000012505.1_ASM1250v1_genomic.gbff.fasta	88.0935
S80_maxbin_15.fasta	GCF_000737595.1_ASM73759v1_genomic.gbff.fasta	78.2532
S80_maxbin_15.fasta	GCF_000161795.2_ASM16179v2_genomic.gbff.fasta	78.1987
S80_maxbin_15.fasta	GCF_000737575.1_ASM73757v1_genomic.gbff.fasta	78.1728
S80_maxbin_15.fasta	GCF_014279615.1_ASM1427961v1_genomic.gbff.fasta	78.162
S80_maxbin_15.fasta	GCF_014279895.1_ASM1427989v1_genomic.gbff.fasta	78.1596
S80_maxbin_15.fasta	GCF_014279535.1_ASM1427953v1_genomic.gbff.fasta	78.1548
S80_maxbin_15.fasta	GCF_014280075.1_ASM1428007v1_genomic.gbff.fasta	78.1332
S80_maxbin_15.fasta	GCF_014280195.1_ASM1428019v1_genomic.gbff.fasta	78.0368
S80_maxbin_15.fasta	GCF_014280215.1_ASM1428021v1_genomic.gbff.fasta	77.9738
S80_maxbin_15.fasta	GCF_014280115.1_ASM1428011v1_genomic.gbff.fasta	77.9683
S80_maxbin_15.fasta	GCF_000012625.1_ASM1262v1_genomic.gbff.fasta	77.966
S80_maxbin_15.fasta	GCF_000195975.1_ASM19597v1_genomic.gbff.fasta	77.9188
S80_maxbin_15.fasta	GCF_014279755.1_ASM1427975v1_genomic.gbff.fasta	77.9145
S80_maxbin_15.fasta	GCF_014280175.1_ASM1428017v1_genomic.gbff.fasta	77.9132
S80_maxbin_15.fasta	GCF_014279635.1_ASM1427963v1_genomic.gbff.fasta	77.9115
S80_maxbin_15.fasta	GCF_014279555.1_ASM1427955v1_genomic.gbff.fasta	77.8992
S80_maxbin_15.fasta	GCF_014280015.1_ASM1428001v1_genomic.gbff.fasta	77.8861
S80_maxbin_15.fasta	GCF_001182765.1_WH8103.1_genomic.gbff.fasta	77.8462
S80_maxbin_15.fasta	GCF_014279775.1_ASM1427977v1_genomic.gbff.fasta	77.833
S80_maxbin_15.fasta	GCF_014279835.1_ASM1427983v1_genomic.gbff.fasta	77.758
S80_maxbin_15.fasta	GCF_000737535.1_ASM73753v1_genomic.gbff.fasta	77.6363
S80_maxbin_15.fasta	GCF_014279955.1_ASM1427995v1_genomic.gbff.fasta	77.6089
S80_maxbin_15.fasta	GCF_014279875.1_ASM1427987v1_genomic.gbff.fasta	77.5955
S80_maxbin_15.fasta	GCF_014279795.1_ASM1427979v1_genomic.gbff.fasta	77.5532
S80_maxbin_15.fasta	GCF_014279655.1_ASM1427965v1_genomic.gbff.fasta	77.5297
S80_maxbin_15.fasta	GCF_014280055.1_ASM1428005v1_genomic.gbff.fasta	77.4839
S80_maxbin_15.fasta	GCF_014304815.1_ASM1430481v1_genomic.gbff.fasta	77.4567
S80_maxbin_15.fasta	GCF_014279815.1_ASM1427981v1_genomic.gbff.fasta	77.2631
S80_maxbin_15.fasta	GCF_004209775.1_ASM420977v1_genomic.gbff.fasta	77.2609
S80_maxbin_15.fasta	GCF_000179235.2_ASM17923v2_genomic.gbff.fasta	77.2238
S80_maxbin_15.fasta	GCF_014304795.1_ASM1430479v1_genomic.gbff.fasta	77.2155
S80_maxbin_15.fasta	GCF_014280035.1_ASM1428003v1_genomic.gbff.fasta	77.2041
S80_maxbin_15.fasta	GCF_014280095.1_ASM1428009v1_genomic.gbff.fasta	77.1979
S80_maxbin_15.fasta	GCF_014279595.1_ASM1427959v1_genomic.gbff.fasta	77.143
S81_maxbin_08.fasta	S81_maxbin_08.fasta	100
S81_maxbin_08.fasta	S80_maxbin_15.fasta	98.2241
S81_maxbin_08.fasta	S79_metabat_3.fasta	98.0345
S81_maxbin_08.fasta	S84_metabat_07.fasta	97.9764
S81_maxbin_08.fasta	S82_metabat_6.fasta	97.8004
S81_maxbin_08.fasta	S83_maxbin_09.fasta	97.2346
S81_maxbin_08.fasta	GCF_000012505.1_ASM1250v1_genomic.gbff.fasta	88.2994
S81_maxbin_08.fasta	GCF_000161795.2_ASM16179v2_genomic.gbff.fasta	78.3909
S81_maxbin_08.fasta	GCF_014279755.1_ASM1427975v1_genomic.gbff.fasta	78.3801
S81_maxbin_08.fasta	GCF_014279615.1_ASM1427961v1_genomic.gbff.fasta	78.304
S81_maxbin_08.fasta	GCF_014280175.1_ASM1428017v1_genomic.gbff.fasta	78.255
S81_maxbin_08.fasta	GCF_014279955.1_ASM1427995v1_genomic.gbff.fasta	78.2471
S81_maxbin_08.fasta	GCF_000195975.1_ASM19597v1_genomic.gbff.fasta	78.2363
S81_maxbin_08.fasta	GCF_014280015.1_ASM1428001v1_genomic.gbff.fasta	78.2185
S81_maxbin_08.fasta	GCF_014279535.1_ASM1427953v1_genomic.gbff.fasta	78.1665
S81_maxbin_08.fasta	GCF_014279555.1_ASM1427955v1_genomic.gbff.fasta	78.1428
S81_maxbin_08.fasta	GCF_014280115.1_ASM1428011v1_genomic.gbff.fasta	78.1216
S81_maxbin_08.fasta	GCF_001182765.1_WH8103.1_genomic.gbff.fasta	78.0868
S81_maxbin_08.fasta	GCF_014280215.1_ASM1428021v1_genomic.gbff.fasta	78.0601
S81_maxbin_08.fasta	GCF_014279895.1_ASM1427989v1_genomic.gbff.fasta	78.0584
S81_maxbin_08.fasta	GCF_000737575.1_ASM73757v1_genomic.gbff.fasta	78.0402
S81_maxbin_08.fasta	GCF_014280055.1_ASM1428005v1_genomic.gbff.fasta	78.014
S81_maxbin_08.fasta	GCF_014280195.1_ASM1428019v1_genomic.gbff.fasta	77.9859
S81_maxbin_08.fasta	GCF_014279635.1_ASM1427963v1_genomic.gbff.fasta	77.9837
S81_maxbin_08.fasta	GCF_000012625.1_ASM1262v1_genomic.gbff.fasta	77.9788
S81_maxbin_08.fasta	GCF_000737535.1_ASM73753v1_genomic.gbff.fasta	77.9613
S81_maxbin_08.fasta	GCF_014279875.1_ASM1427987v1_genomic.gbff.fasta	77.9397
S81_maxbin_08.fasta	GCF_000737595.1_ASM73759v1_genomic.gbff.fasta	77.9376
S81_maxbin_08.fasta	GCF_014279835.1_ASM1427983v1_genomic.gbff.fasta	77.9168
S81_maxbin_08.fasta	GCF_014280075.1_ASM1428007v1_genomic.gbff.fasta	77.8321
S81_maxbin_08.fasta	GCF_014279655.1_ASM1427965v1_genomic.gbff.fasta	77.7793
S81_maxbin_08.fasta	GCF_014279795.1_ASM1427979v1_genomic.gbff.fasta	77.7152
S81_maxbin_08.fasta	GCF_014304815.1_ASM1430481v1_genomic.gbff.fasta	77.5846
S81_maxbin_08.fasta	GCF_014279815.1_ASM1427981v1_genomic.gbff.fasta	77.5813
S81_maxbin_08.fasta	GCF_014279595.1_ASM1427959v1_genomic.gbff.fasta	77.2797
S81_maxbin_08.fasta	GCF_014304795.1_ASM1430479v1_genomic.gbff.fasta	77.1392
S81_maxbin_08.fasta	GCF_004209775.1_ASM420977v1_genomic.gbff.fasta	77.1085
S82_metabat_6.fasta	S82_metabat_6.fasta	100
S82_metabat_6.fasta	S80_maxbin_15.fasta	98.5611
S82_metabat_6.fasta	S84_metabat_07.fasta	98.0257
S82_metabat_6.fasta	S79_metabat_3.fasta	97.7091
S82_metabat_6.fasta	S81_maxbin_08.fasta	97.495
S82_metabat_6.fasta	S83_maxbin_09.fasta	97.2885
S82_metabat_6.fasta	GCF_000012505.1_ASM1250v1_genomic.gbff.fasta	88.335
S82_metabat_6.fasta	GCF_014280175.1_ASM1428017v1_genomic.gbff.fasta	78.0815
S82_metabat_6.fasta	GCF_014279615.1_ASM1427961v1_genomic.gbff.fasta	77.9886
S82_metabat_6.fasta	GCF_014280115.1_ASM1428011v1_genomic.gbff.fasta	77.9627
S82_metabat_6.fasta	GCF_014279535.1_ASM1427953v1_genomic.gbff.fasta	77.8943
S82_metabat_6.fasta	GCF_000737595.1_ASM73759v1_genomic.gbff.fasta	77.8464
S82_metabat_6.fasta	GCF_014279635.1_ASM1427963v1_genomic.gbff.fasta	77.8422
S82_metabat_6.fasta	GCF_000161795.2_ASM16179v2_genomic.gbff.fasta	77.834
S82_metabat_6.fasta	GCF_000012625.1_ASM1262v1_genomic.gbff.fasta	77.8158
S82_metabat_6.fasta	GCF_014280075.1_ASM1428007v1_genomic.gbff.fasta	77.8053
S82_metabat_6.fasta	GCF_014279895.1_ASM1427989v1_genomic.gbff.fasta	77.7809
S82_metabat_6.fasta	GCF_014280215.1_ASM1428021v1_genomic.gbff.fasta	77.7706
S82_metabat_6.fasta	GCF_014279755.1_ASM1427975v1_genomic.gbff.fasta	77.7133
S82_metabat_6.fasta	GCF_000737575.1_ASM73757v1_genomic.gbff.fasta	77.6965
S82_metabat_6.fasta	GCF_014279955.1_ASM1427995v1_genomic.gbff.fasta	77.6822
S82_metabat_6.fasta	GCF_014280055.1_ASM1428005v1_genomic.gbff.fasta	77.5371
S82_metabat_6.fasta	GCF_014279655.1_ASM1427965v1_genomic.gbff.fasta	77.5195
S82_metabat_6.fasta	GCF_014279795.1_ASM1427979v1_genomic.gbff.fasta	77.5041
S82_metabat_6.fasta	GCF_014280195.1_ASM1428019v1_genomic.gbff.fasta	77.4778
S82_metabat_6.fasta	GCF_001182765.1_WH8103.1_genomic.gbff.fasta	77.4541
S82_metabat_6.fasta	GCF_000195975.1_ASM19597v1_genomic.gbff.fasta	77.4419
S82_metabat_6.fasta	GCF_000737535.1_ASM73753v1_genomic.gbff.fasta	77.3735
S82_metabat_6.fasta	GCF_014280035.1_ASM1428003v1_genomic.gbff.fasta	77.3314
S82_metabat_6.fasta	GCF_004209775.1_ASM420977v1_genomic.gbff.fasta	77.3165
S82_metabat_6.fasta	GCF_014280015.1_ASM1428001v1_genomic.gbff.fasta	77.3092
S82_metabat_6.fasta	GCF_014279875.1_ASM1427987v1_genomic.gbff.fasta	77.3011
S82_metabat_6.fasta	GCF_014280095.1_ASM1428009v1_genomic.gbff.fasta	77.2946
S82_metabat_6.fasta	GCF_014279815.1_ASM1427981v1_genomic.gbff.fasta	77.2762
S82_metabat_6.fasta	GCF_014304815.1_ASM1430481v1_genomic.gbff.fasta	77.2484
S82_metabat_6.fasta	GCF_014304795.1_ASM1430479v1_genomic.gbff.fasta	77.1805
S82_metabat_6.fasta	GCF_014279595.1_ASM1427959v1_genomic.gbff.fasta	76.9301
S83_maxbin_09.fasta	S83_maxbin_09.fasta	100
S83_maxbin_09.fasta	S80_maxbin_15.fasta	98.3344
S83_maxbin_09.fasta	S82_metabat_6.fasta	97.8203
S83_maxbin_09.fasta	S84_metabat_07.fasta	97.5121
S83_maxbin_09.fasta	S81_maxbin_08.fasta	97.5069
S83_maxbin_09.fasta	S79_metabat_3.fasta	97.3858
S83_maxbin_09.fasta	GCF_000012505.1_ASM1250v1_genomic.gbff.fasta	88.2322
S83_maxbin_09.fasta	GCF_014280075.1_ASM1428007v1_genomic.gbff.fasta	78.5953
S83_maxbin_09.fasta	GCF_014280115.1_ASM1428011v1_genomic.gbff.fasta	78.4623
S83_maxbin_09.fasta	GCF_014279635.1_ASM1427963v1_genomic.gbff.fasta	78.4127
S83_maxbin_09.fasta	GCF_014279895.1_ASM1427989v1_genomic.gbff.fasta	78.4058
S83_maxbin_09.fasta	GCF_014280175.1_ASM1428017v1_genomic.gbff.fasta	78.4015
S83_maxbin_09.fasta	GCF_014279535.1_ASM1427953v1_genomic.gbff.fasta	78.3347
S83_maxbin_09.fasta	GCF_000012625.1_ASM1262v1_genomic.gbff.fasta	78.2786
S83_maxbin_09.fasta	GCF_014279615.1_ASM1427961v1_genomic.gbff.fasta	78.2566
S83_maxbin_09.fasta	GCF_000737595.1_ASM73759v1_genomic.gbff.fasta	78.243
S83_maxbin_09.fasta	GCF_014279755.1_ASM1427975v1_genomic.gbff.fasta	78.1512
S83_maxbin_09.fasta	GCF_000161795.2_ASM16179v2_genomic.gbff.fasta	78.1164
S83_maxbin_09.fasta	GCF_000737575.1_ASM73757v1_genomic.gbff.fasta	78.031
S83_maxbin_09.fasta	GCF_014280215.1_ASM1428021v1_genomic.gbff.fasta	77.9542
S83_maxbin_09.fasta	GCF_014280195.1_ASM1428019v1_genomic.gbff.fasta	77.9287
S83_maxbin_09.fasta	GCF_014279955.1_ASM1427995v1_genomic.gbff.fasta	77.8446
S83_maxbin_09.fasta	GCF_000195975.1_ASM19597v1_genomic.gbff.fasta	77.5905
S83_maxbin_09.fasta	GCF_014280015.1_ASM1428001v1_genomic.gbff.fasta	77.5871
S83_maxbin_09.fasta	GCF_014304815.1_ASM1430481v1_genomic.gbff.fasta	77.4511
S83_maxbin_09.fasta	GCF_014279815.1_ASM1427981v1_genomic.gbff.fasta	77.3757
S83_maxbin_09.fasta	GCF_001182765.1_WH8103.1_genomic.gbff.fasta	77.3255
S83_maxbin_09.fasta	GCF_014279875.1_ASM1427987v1_genomic.gbff.fasta	77.3236
S83_maxbin_09.fasta	GCF_014280055.1_ASM1428005v1_genomic.gbff.fasta	77.3229
S83_maxbin_09.fasta	GCF_014279795.1_ASM1427979v1_genomic.gbff.fasta	77.3136
S83_maxbin_09.fasta	GCF_014280035.1_ASM1428003v1_genomic.gbff.fasta	77.2716
S83_maxbin_09.fasta	GCF_000737535.1_ASM73753v1_genomic.gbff.fasta	77.1708
S83_maxbin_09.fasta	GCF_004209775.1_ASM420977v1_genomic.gbff.fasta	77.1081
S83_maxbin_09.fasta	GCF_014304795.1_ASM1430479v1_genomic.gbff.fasta	77.1081
S83_maxbin_09.fasta	GCF_014280095.1_ASM1428009v1_genomic.gbff.fasta	77.0761
S83_maxbin_09.fasta	GCF_014279595.1_ASM1427959v1_genomic.gbff.fasta	76.8731
S83_maxbin_09.fasta	GCF_000179235.2_ASM17923v2_genomic.gbff.fasta	76.8567
S84_metabat_04.fasta	S84_metabat_04.fasta	100
S84_metabat_04.fasta	S77_metabat_06.fasta	98.1512
S84_metabat_06.fasta	S84_metabat_06.fasta	100
S84_metabat_07.fasta	S84_metabat_07.fasta	99.9999
S84_metabat_07.fasta	S80_maxbin_15.fasta	98.4171
S84_metabat_07.fasta	S82_metabat_6.fasta	97.8502
S84_metabat_07.fasta	S79_metabat_3.fasta	97.6495
S84_metabat_07.fasta	S81_maxbin_08.fasta	97.635
S84_metabat_07.fasta	S83_maxbin_09.fasta	97.2104
S84_metabat_07.fasta	GCF_000012505.1_ASM1250v1_genomic.gbff.fasta	88.3483
S84_metabat_07.fasta	GCF_014279775.1_ASM1427977v1_genomic.gbff.fasta	78.7797
S84_metabat_07.fasta	GCF_014280175.1_ASM1428017v1_genomic.gbff.fasta	78.7708
S84_metabat_07.fasta	GCF_014279835.1_ASM1427983v1_genomic.gbff.fasta	78.5766
S84_metabat_07.fasta	GCF_014279635.1_ASM1427963v1_genomic.gbff.fasta	78.5089
S84_metabat_07.fasta	GCF_014279755.1_ASM1427975v1_genomic.gbff.fasta	78.4874
S84_metabat_07.fasta	GCF_000737575.1_ASM73757v1_genomic.gbff.fasta	78.4553
S84_metabat_07.fasta	GCF_014280115.1_ASM1428011v1_genomic.gbff.fasta	78.3932
S84_metabat_07.fasta	GCF_000012625.1_ASM1262v1_genomic.gbff.fasta	78.3638
S84_metabat_07.fasta	GCF_014280215.1_ASM1428021v1_genomic.gbff.fasta	78.3401
S84_metabat_07.fasta	GCF_014280075.1_ASM1428007v1_genomic.gbff.fasta	78.326
S84_metabat_07.fasta	GCF_014280195.1_ASM1428019v1_genomic.gbff.fasta	78.3144
S84_metabat_07.fasta	GCF_000737595.1_ASM73759v1_genomic.gbff.fasta	78.3099
S84_metabat_07.fasta	GCF_014279535.1_ASM1427953v1_genomic.gbff.fasta	78.2915
S84_metabat_07.fasta	GCF_014279555.1_ASM1427955v1_genomic.gbff.fasta	78.2907
S84_metabat_07.fasta	GCF_014279895.1_ASM1427989v1_genomic.gbff.fasta	78.2743
S84_metabat_07.fasta	GCF_000161795.2_ASM16179v2_genomic.gbff.fasta	78.2047
S84_metabat_07.fasta	GCF_014279795.1_ASM1427979v1_genomic.gbff.fasta	78.1401
S84_metabat_07.fasta	GCF_014279615.1_ASM1427961v1_genomic.gbff.fasta	78.1167
S84_metabat_07.fasta	GCF_014280015.1_ASM1428001v1_genomic.gbff.fasta	78.1152
S84_metabat_07.fasta	GCF_014279955.1_ASM1427995v1_genomic.gbff.fasta	78.1143
S84_metabat_07.fasta	GCF_014279655.1_ASM1427965v1_genomic.gbff.fasta	78.0564
S84_metabat_07.fasta	GCF_001182765.1_WH8103.1_genomic.gbff.fasta	78.0493
S84_metabat_07.fasta	GCF_014304815.1_ASM1430481v1_genomic.gbff.fasta	78.0074
S84_metabat_07.fasta	GCF_000195975.1_ASM19597v1_genomic.gbff.fasta	78.0022
S84_metabat_07.fasta	GCF_014279875.1_ASM1427987v1_genomic.gbff.fasta	77.9934
S84_metabat_07.fasta	GCF_014280055.1_ASM1428005v1_genomic.gbff.fasta	77.9923
S84_metabat_07.fasta	GCF_000014585.1_ASM1458v1_genomic.gbff.fasta	77.9167
S84_metabat_07.fasta	GCF_014280095.1_ASM1428009v1_genomic.gbff.fasta	77.8714
S84_metabat_07.fasta	GCF_014279595.1_ASM1427959v1_genomic.gbff.fasta	77.8538
S84_metabat_07.fasta	GCF_014280035.1_ASM1428003v1_genomic.gbff.fasta	77.8491
S84_metabat_07.fasta	GCF_014279975.1_ASM1427997v1_genomic.gbff.fasta	77.8354
S84_metabat_07.fasta	GCF_004209775.1_ASM420977v1_genomic.gbff.fasta	77.8032
S84_metabat_07.fasta	GCF_014304795.1_ASM1430479v1_genomic.gbff.fasta	77.7928
S84_metabat_07.fasta	GCF_000737535.1_ASM73753v1_genomic.gbff.fasta	77.7526
S84_metabat_07.fasta	GCF_014279815.1_ASM1427981v1_genomic.gbff.fasta	77.7391
S84_metabat_07.fasta	GCF_014279855.1_ASM1427985v1_genomic.gbff.fasta	77.2132
S84_metabat_07.fasta	GCF_015840915.1_ASM1584091v1_genomic.gbff.fasta	77.1396
S84_metabat_07.fasta	GCF_000179235.2_ASM17923v2_genomic.gbff.fasta	77.1198
S84_metabat_07.fasta	GCF_015840525.1_ASM1584052v1_genomic.gbff.fasta	77.0799
Archaea
Genome 1	Genome 2	ANI Score (%)
GCF_000018465.1_ASM1846v1_genomic.gbff_.fasta	S75_metabat_05.fasta	79.62
GCF_000018465.1_ASM1846v1_genomic.gbff_.fasta	S78_metabat_6.fasta	79.5867
GCF_000018465.1_ASM1846v1_genomic.gbff_.fasta	S76_metabat_4.fasta	79.3391
GCF_000018465.1_ASM1846v1_genomic.gbff_.fasta	S77_metabat_07.fasta	78.9962
GCF_000299365.1_ASM29936v1_genomic.gbff_.fasta	S75_metabat_05.fasta	79.4827
GCF_000299365.1_ASM29936v1_genomic.gbff_.fasta	S76_metabat_4.fasta	78.958
GCF_000299365.1_ASM29936v1_genomic.gbff_.fasta	S77_metabat_07.fasta	78.9555
GCF_000299365.1_ASM29936v1_genomic.gbff_.fasta	S78_metabat_6.fasta	78.6784
GCF_000299395.1_ASM29939v1_genomic.gbff_.fasta	S75_metabat_05.fasta	79.9725
GCF_000299395.1_ASM29939v1_genomic.gbff_.fasta	S76_metabat_4.fasta	79.6872
GCF_000299395.1_ASM29939v1_genomic.gbff_.fasta	S78_metabat_6.fasta	79.341
GCF_000299395.1_ASM29939v1_genomic.gbff_.fasta	S77_metabat_07.fasta	79.3214
GCF_000812185.1_ASM81218v1_genomic.gbff_.fasta	S78_metabat_6.fasta	81.6548
GCF_000812185.1_ASM81218v1_genomic.gbff_.fasta	S77_metabat_07.fasta	80.4413
GCF_000812185.1_ASM81218v1_genomic.gbff_.fasta	S75_metabat_05.fasta	77.4671
GCF_000812185.1_ASM81218v1_genomic.gbff_.fasta	S76_metabat_4.fasta	77.3023
GCF_000875775.1_ASM87577v1_genomic.gbff_.fasta	S75_metabat_05.fasta	79.7854
GCF_000875775.1_ASM87577v1_genomic.gbff_.fasta	S78_metabat_6.fasta	79.1387
GCF_000875775.1_ASM87577v1_genomic.gbff_.fasta	S76_metabat_4.fasta	79.1078
GCF_000875775.1_ASM87577v1_genomic.gbff_.fasta	S77_metabat_07.fasta	78.8621
GCF_000956175.1_ASM95617v1_genomic.gbff_.fasta	S75_metabat_05.fasta	80.0855
GCF_000956175.1_ASM95617v1_genomic.gbff_.fasta	S76_metabat_4.fasta	79.7601
GCF_000956175.1_ASM95617v1_genomic.gbff_.fasta	S77_metabat_07.fasta	79.3444
GCF_000956175.1_ASM95617v1_genomic.gbff_.fasta	S78_metabat_6.fasta	79.0589
GCF_002156965.1_ASM215696v1_genomic.gbff_.fasta	S75_metabat_05.fasta	85.267
GCF_002156965.1_ASM215696v1_genomic.gbff_.fasta	S76_metabat_4.fasta	84.8113
GCF_002156965.1_ASM215696v1_genomic.gbff_.fasta	S78_metabat_6.fasta	84.7467
GCF_002156965.1_ASM215696v1_genomic.gbff_.fasta	S77_metabat_07.fasta	84.6022
GCF_006740685.1_ASM674068v1_genomic.gbff_.fasta	S75_metabat_05.fasta	79.8595
GCF_006740685.1_ASM674068v1_genomic.gbff_.fasta	S76_metabat_4.fasta	79.2484
GCF_006740685.1_ASM674068v1_genomic.gbff_.fasta	S78_metabat_6.fasta	79.2409
GCF_006740685.1_ASM674068v1_genomic.gbff_.fasta	S77_metabat_07.fasta	78.9903
GCF_013407145.1_ASM1340714v1_genomic.gbff_.fasta	S75_metabat_05.fasta	80.6474
GCF_013407145.1_ASM1340714v1_genomic.gbff_.fasta	S78_metabat_6.fasta	80.2559
GCF_013407145.1_ASM1340714v1_genomic.gbff_.fasta	S77_metabat_07.fasta	80.24
GCF_013407145.1_ASM1340714v1_genomic.gbff_.fasta	S76_metabat_4.fasta	80.0791
GCF_013407165.1_ASM1340716v1_genomic.gbff_.fasta	S75_metabat_05.fasta	80.5064
GCF_013407165.1_ASM1340716v1_genomic.gbff_.fasta	S76_metabat_4.fasta	80.1545
GCF_013407165.1_ASM1340716v1_genomic.gbff_.fasta	S78_metabat_6.fasta	80.0148
GCF_013407165.1_ASM1340716v1_genomic.gbff_.fasta	S77_metabat_07.fasta	79.2842
GCF_013407185.1_ASM1340718v1_genomic.gbff_.fasta	S75_metabat_05.fasta	79.8503
GCF_013407185.1_ASM1340718v1_genomic.gbff_.fasta	S76_metabat_4.fasta	79.6513
GCF_013407185.1_ASM1340718v1_genomic.gbff_.fasta	S78_metabat_6.fasta	79.3074
GCF_013407185.1_ASM1340718v1_genomic.gbff_.fasta	S77_metabat_07.fasta	78.9801
GCF_013407385.1_ASM1340738v1_genomic.gbff_.fasta	S75_metabat_05.fasta	78.8856
GCF_013407385.1_ASM1340738v1_genomic.gbff_.fasta	S76_metabat_4.fasta	78.6696
GCF_013407385.1_ASM1340738v1_genomic.gbff_.fasta	S78_metabat_6.fasta	78.5337
GCF_013407385.1_ASM1340738v1_genomic.gbff_.fasta	S77_metabat_07.fasta	78.3601
S75_maxbin_06.fasta	S75_maxbin_06.fasta	100
S75_maxbin_06.fasta	S77_metabat_01.fasta	99.501
S75_maxbin_06.fasta	S84_metabat_03.fasta	99.2623
S75_maxbin_06.fasta	S82_metabat_3.fasta	99.221
S75_maxbin_06.fasta	S78_metabat_2.fasta	99.2181
S75_maxbin_06.fasta	S81_metabat_03.fasta	99.185
S75_maxbin_06.fasta	S76_metabat_1.fasta	99.1456
S75_maxbin_06.fasta	S83_metabat_2.fasta	99.0774
S75_metabat_05.fasta	S75_metabat_05.fasta	100
S75_metabat_05.fasta	S76_metabat_4.fasta	98.6777
S75_metabat_05.fasta	S77_metabat_07.fasta	98.1154
S75_metabat_05.fasta	S78_metabat_6.fasta	97.5885
S75_metabat_05.fasta	GCF_002156965.1_ASM215696v1_genomic.gbff_.fasta	85.5785
S75_metabat_05.fasta	GCF_013407145.1_ASM1340714v1_genomic.gbff_.fasta	81.035
S75_metabat_05.fasta	GCF_013407165.1_ASM1340716v1_genomic.gbff_.fasta	80.9991
S75_metabat_05.fasta	GCF_000956175.1_ASM95617v1_genomic.gbff_.fasta	80.4336
S75_metabat_05.fasta	GCF_000299395.1_ASM29939v1_genomic.gbff_.fasta	80.2031
S75_metabat_05.fasta	GCF_013407185.1_ASM1340718v1_genomic.gbff_.fasta	80.1672
S75_metabat_05.fasta	GCF_000018465.1_ASM1846v1_genomic.gbff_.fasta	80.1035
S75_metabat_05.fasta	GCF_006740685.1_ASM674068v1_genomic.gbff_.fasta	79.9497
S75_metabat_05.fasta	GCF_000299365.1_ASM29936v1_genomic.gbff_.fasta	79.7338
S75_metabat_05.fasta	GCF_000875775.1_ASM87577v1_genomic.gbff_.fasta	79.6224
S75_metabat_05.fasta	GCF_013407385.1_ASM1340738v1_genomic.gbff_.fasta	78.8292
S75_metabat_05.fasta	GCF_000812185.1_ASM81218v1_genomic.gbff_.fasta	77.5281
S76_metabat_1.fasta	S76_metabat_1.fasta	100
S76_metabat_1.fasta	S77_metabat_01.fasta	99.4724
S76_metabat_1.fasta	S82_metabat_3.fasta	99.2672
S76_metabat_1.fasta	S75_maxbin_06.fasta	99.1983
S76_metabat_1.fasta	S84_metabat_03.fasta	99.1532
S76_metabat_1.fasta	S83_metabat_2.fasta	99.142
S76_metabat_1.fasta	S78_metabat_2.fasta	99.0925
S76_metabat_1.fasta	S81_metabat_03.fasta	99.0845
S76_metabat_4.fasta	S76_metabat_4.fasta	100
S76_metabat_4.fasta	S75_metabat_05.fasta	98.6196
S76_metabat_4.fasta	S78_metabat_6.fasta	98.0622
S76_metabat_4.fasta	S77_metabat_07.fasta	98.0092
S76_metabat_4.fasta	GCF_002156965.1_ASM215696v1_genomic.gbff_.fasta	84.9016
S76_metabat_4.fasta	GCF_013407165.1_ASM1340716v1_genomic.gbff_.fasta	80.7678
S76_metabat_4.fasta	GCF_013407145.1_ASM1340714v1_genomic.gbff_.fasta	80.3404
S76_metabat_4.fasta	GCF_006740685.1_ASM674068v1_genomic.gbff_.fasta	80.0145
S76_metabat_4.fasta	GCF_000299395.1_ASM29939v1_genomic.gbff_.fasta	79.9803
S76_metabat_4.fasta	GCF_013407185.1_ASM1340718v1_genomic.gbff_.fasta	79.8865
S76_metabat_4.fasta	GCF_000956175.1_ASM95617v1_genomic.gbff_.fasta	79.713
S76_metabat_4.fasta	GCF_000018465.1_ASM1846v1_genomic.gbff_.fasta	79.6328
S76_metabat_4.fasta	GCF_000875775.1_ASM87577v1_genomic.gbff_.fasta	79.1229
S76_metabat_4.fasta	GCF_000299365.1_ASM29936v1_genomic.gbff_.fasta	79.0285
S76_metabat_4.fasta	GCF_013407385.1_ASM1340738v1_genomic.gbff_.fasta	78.3686
S76_metabat_4.fasta	GCF_000812185.1_ASM81218v1_genomic.gbff_.fasta	77.6388
S77_maxbin_10.fasta	S77_maxbin_10.fasta	100
S77_metabat_01.fasta	S77_metabat_01.fasta	100
S77_metabat_01.fasta	S84_metabat_03.fasta	99.3897
S77_metabat_01.fasta	S75_maxbin_06.fasta	99.3694
S77_metabat_01.fasta	S78_metabat_2.fasta	99.3142
S77_metabat_01.fasta	S82_metabat_3.fasta	99.2809
S77_metabat_01.fasta	S76_metabat_1.fasta	99.2328
S77_metabat_01.fasta	S81_metabat_03.fasta	99.2113
S77_metabat_01.fasta	S83_metabat_2.fasta	99.1196
S77_metabat_07.fasta	S77_metabat_07.fasta	100
S77_metabat_07.fasta	S75_metabat_05.fasta	98.1052
S77_metabat_07.fasta	S76_metabat_4.fasta	97.6436
S77_metabat_07.fasta	S78_metabat_6.fasta	97.4716
S77_metabat_07.fasta	GCF_002156965.1_ASM215696v1_genomic.gbff_.fasta	85.1769
S77_metabat_07.fasta	GCF_000812185.1_ASM81218v1_genomic.gbff_.fasta	80.6562
S77_metabat_07.fasta	GCF_013407145.1_ASM1340714v1_genomic.gbff_.fasta	80.3658
S77_metabat_07.fasta	GCF_013407165.1_ASM1340716v1_genomic.gbff_.fasta	79.7924
S77_metabat_07.fasta	GCF_000299395.1_ASM29939v1_genomic.gbff_.fasta	79.6795
S77_metabat_07.fasta	GCF_000956175.1_ASM95617v1_genomic.gbff_.fasta	79.4573
S77_metabat_07.fasta	GCF_000299365.1_ASM29936v1_genomic.gbff_.fasta	79.3333
S77_metabat_07.fasta	GCF_000875775.1_ASM87577v1_genomic.gbff_.fasta	79.2705
S77_metabat_07.fasta	GCF_013407185.1_ASM1340718v1_genomic.gbff_.fasta	79.2606
S77_metabat_07.fasta	GCF_000018465.1_ASM1846v1_genomic.gbff_.fasta	79.1675
S77_metabat_07.fasta	GCF_006740685.1_ASM674068v1_genomic.gbff_.fasta	79.0777
S77_metabat_07.fasta	GCF_013407385.1_ASM1340738v1_genomic.gbff_.fasta	78.7242
S78_metabat_2.fasta	S78_metabat_2.fasta	100
S78_metabat_2.fasta	S77_metabat_01.fasta	99.4055
S78_metabat_2.fasta	S75_maxbin_06.fasta	99.3422
S78_metabat_2.fasta	S82_metabat_3.fasta	99.2357
S78_metabat_2.fasta	S84_metabat_03.fasta	99.2212
S78_metabat_2.fasta	S81_metabat_03.fasta	99.1534
S78_metabat_2.fasta	S76_metabat_1.fasta	99.025
S78_metabat_2.fasta	S83_metabat_2.fasta	99.013
S78_metabat_6.fasta	S78_metabat_6.fasta	100
S78_metabat_6.fasta	S76_metabat_4.fasta	98.0646
S78_metabat_6.fasta	S75_metabat_05.fasta	97.5901
S78_metabat_6.fasta	S77_metabat_07.fasta	97.2022
S78_metabat_6.fasta	GCF_002156965.1_ASM215696v1_genomic.gbff_.fasta	85.0555
S78_metabat_6.fasta	GCF_000812185.1_ASM81218v1_genomic.gbff_.fasta	81.9054
S78_metabat_6.fasta	GCF_013407145.1_ASM1340714v1_genomic.gbff_.fasta	80.5667
S78_metabat_6.fasta	GCF_013407165.1_ASM1340716v1_genomic.gbff_.fasta	80.363
S78_metabat_6.fasta	GCF_013407185.1_ASM1340718v1_genomic.gbff_.fasta	79.6928
S78_metabat_6.fasta	GCF_000956175.1_ASM95617v1_genomic.gbff_.fasta	79.6491
S78_metabat_6.fasta	GCF_000299395.1_ASM29939v1_genomic.gbff_.fasta	79.5822
S78_metabat_6.fasta	GCF_006740685.1_ASM674068v1_genomic.gbff_.fasta	79.5019
S78_metabat_6.fasta	GCF_000018465.1_ASM1846v1_genomic.gbff_.fasta	79.3308
S78_metabat_6.fasta	GCF_000875775.1_ASM87577v1_genomic.gbff_.fasta	79.1929
S78_metabat_6.fasta	GCF_000299365.1_ASM29936v1_genomic.gbff_.fasta	79.0044
S78_metabat_6.fasta	GCF_013407385.1_ASM1340738v1_genomic.gbff_.fasta	78.5521
S81_metabat_03.fasta	S81_metabat_03.fasta	100
S81_metabat_03.fasta	S77_metabat_01.fasta	99.4414
S81_metabat_03.fasta	S84_metabat_03.fasta	99.3205
S81_metabat_03.fasta	S75_maxbin_06.fasta	99.2588
S81_metabat_03.fasta	S82_metabat_3.fasta	99.2355
S81_metabat_03.fasta	S78_metabat_2.fasta	99.1985
S81_metabat_03.fasta	S83_metabat_2.fasta	99.1879
S81_metabat_03.fasta	S76_metabat_1.fasta	99.0312
S82_metabat_3.fasta	S82_metabat_3.fasta	100
S82_metabat_3.fasta	S77_metabat_01.fasta	99.5172
S82_metabat_3.fasta	S81_metabat_03.fasta	99.3158
S82_metabat_3.fasta	S75_maxbin_06.fasta	99.239
S82_metabat_3.fasta	S84_metabat_03.fasta	99.2318
S82_metabat_3.fasta	S78_metabat_2.fasta	99.1462
S82_metabat_3.fasta	S83_metabat_2.fasta	99.1176
S82_metabat_3.fasta	S76_metabat_1.fasta	99.0028
S83_metabat_2.fasta	S83_metabat_2.fasta	99.9998
S83_metabat_2.fasta	S77_metabat_01.fasta	99.4984
S83_metabat_2.fasta	S84_metabat_03.fasta	99.308
S83_metabat_2.fasta	S81_metabat_03.fasta	99.2105
S83_metabat_2.fasta	S75_maxbin_06.fasta	99.165
S83_metabat_2.fasta	S82_metabat_3.fasta	99.1242
S83_metabat_2.fasta	S78_metabat_2.fasta	99.092
S83_metabat_2.fasta	S76_metabat_1.fasta	99.0372
S84_metabat_03.fasta	S84_metabat_03.fasta	100
S84_metabat_03.fasta	S77_metabat_01.fasta	99.4884
S84_metabat_03.fasta	S75_maxbin_06.fasta	99.2317
S84_metabat_03.fasta	S78_metabat_2.fasta	99.2187
S84_metabat_03.fasta	S81_metabat_03.fasta	99.188
S84_metabat_03.fasta	S83_metabat_2.fasta	99.1282
S84_metabat_03.fasta	S82_metabat_3.fasta	99.1079
S84_metabat_03.fasta	S76_metabat_1.fasta	99.0737
